# Supplementary material for: Fe2O3 nanocluster-decorated graphene as O2 electrode for high energy Li–O2 batteries
Source: Royal Society of Chemistry journal article supplement (doi:10.1039/c2ra20757e), 2012-01-01
Supplement: c2ra20757e.pdf [file c2ra20757e.pdf]

## Supporting Information

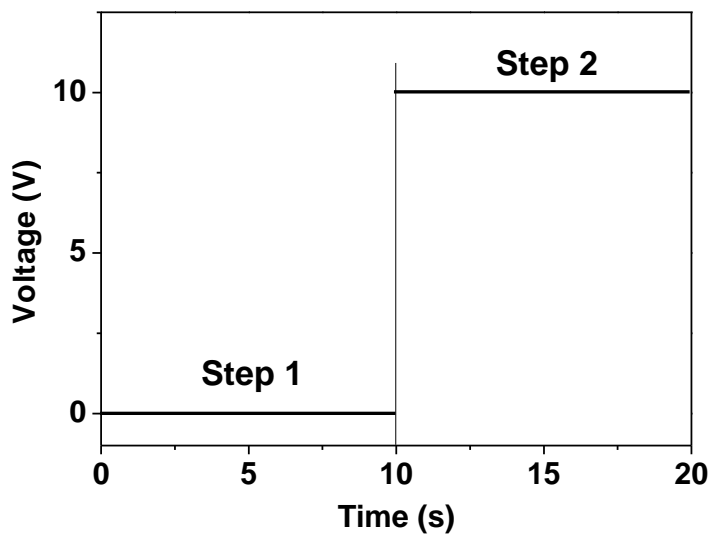

Figure S1. Applied step-voltage in the electrochemical preparation of Fe<sub>2</sub>O<sub>3</sub>/graphene hybrids.

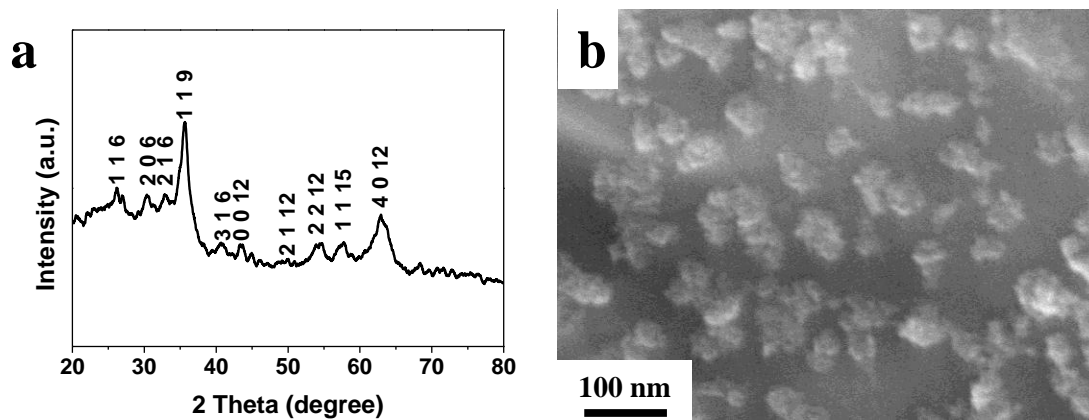

Figure S2. (a) XRD pattern and (b) SEM image of the Fe<sub>2</sub>O<sub>3</sub>/graphene hybrid with  $I_{\text{FeSO}_4}=0.03$  M.

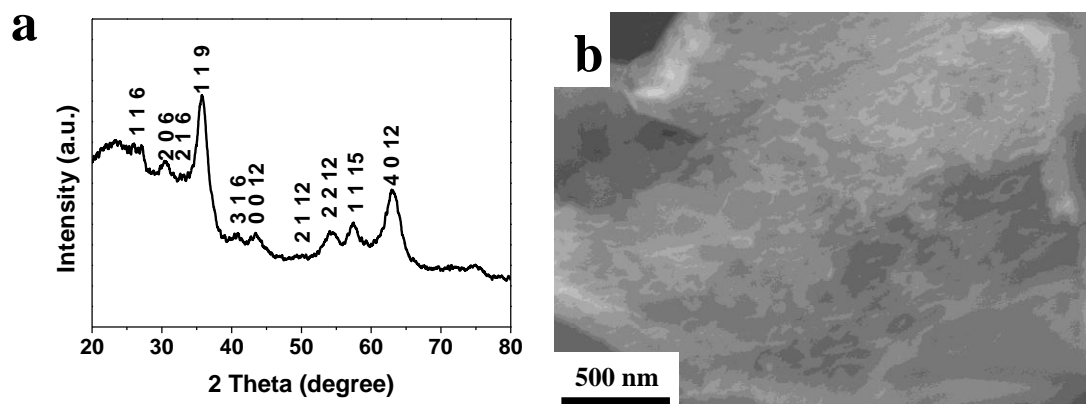

Figure S3. (a) XRD pattern and (b) SEM image of the Fe<sub>2</sub>O<sub>3</sub>/graphene hybrid with I<sub>FeSO<sub>4</sub></sub>=0.15 M.

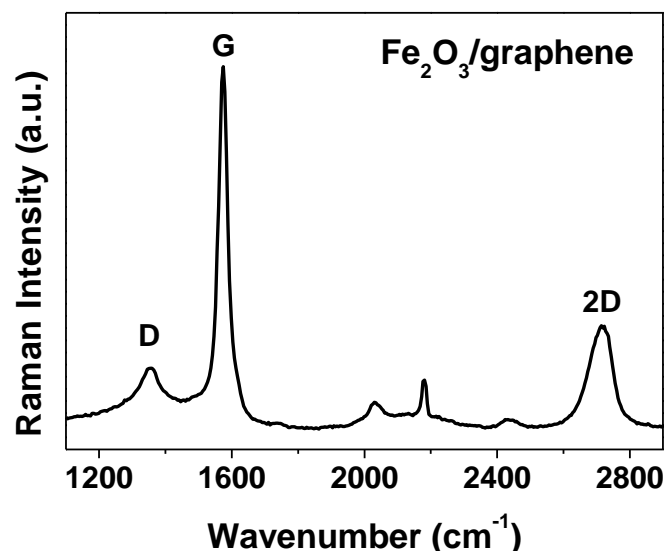

Figure S4. Raman spectrum of the Fe<sub>2</sub>O<sub>3</sub>/graphene hybrid with I<sub>FeSO<sub>4</sub></sub>=0.1 M.

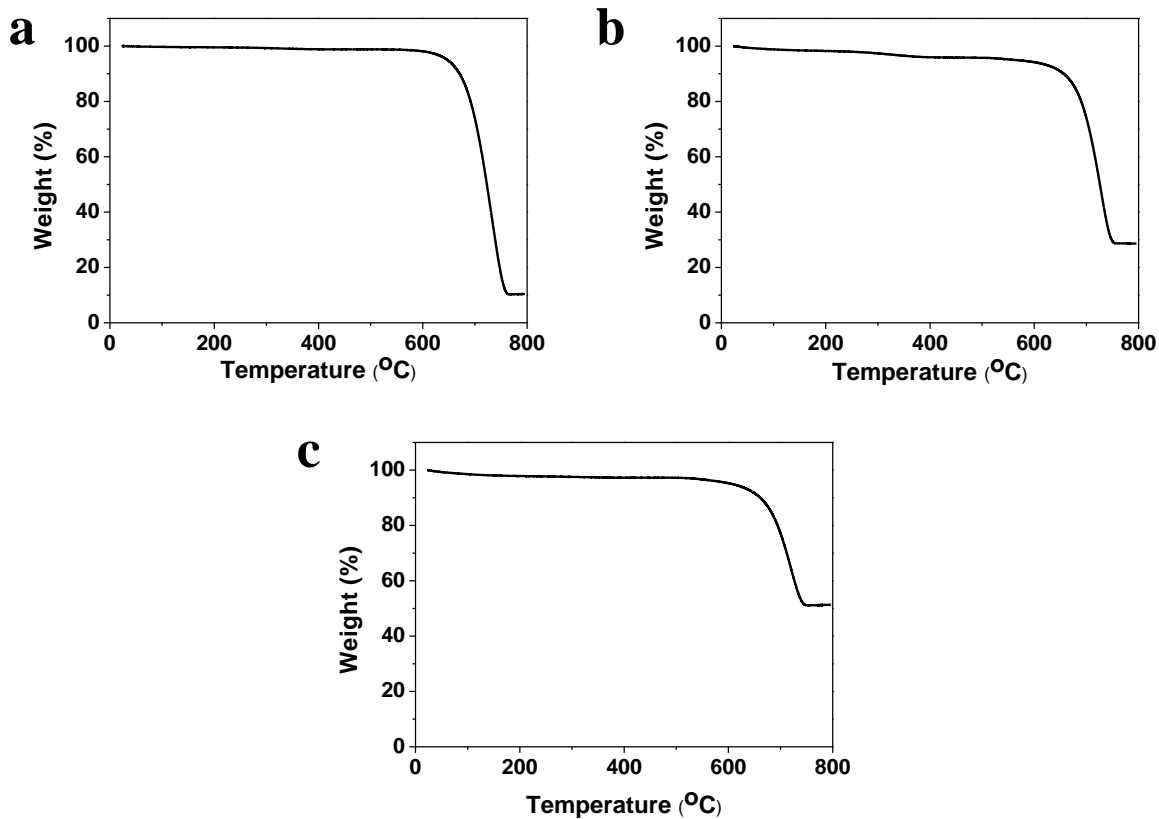

Figure S5. TGA results of Fe<sub>2</sub>O<sub>3</sub>/graphene samples prepared with I<sub>FeSO<sub>4</sub></sub> = (a) 0.03, (b) 0.1 and (c) 0.15 M, respectively. The corresponding contents of Fe<sub>2</sub>O<sub>3</sub>, C<sub>Fe<sub>2</sub>O<sub>3</sub></sub>, are estimated to be (a) 10.7 wt%, (b) 29.0 wt% and (c) 52.1 wt%.

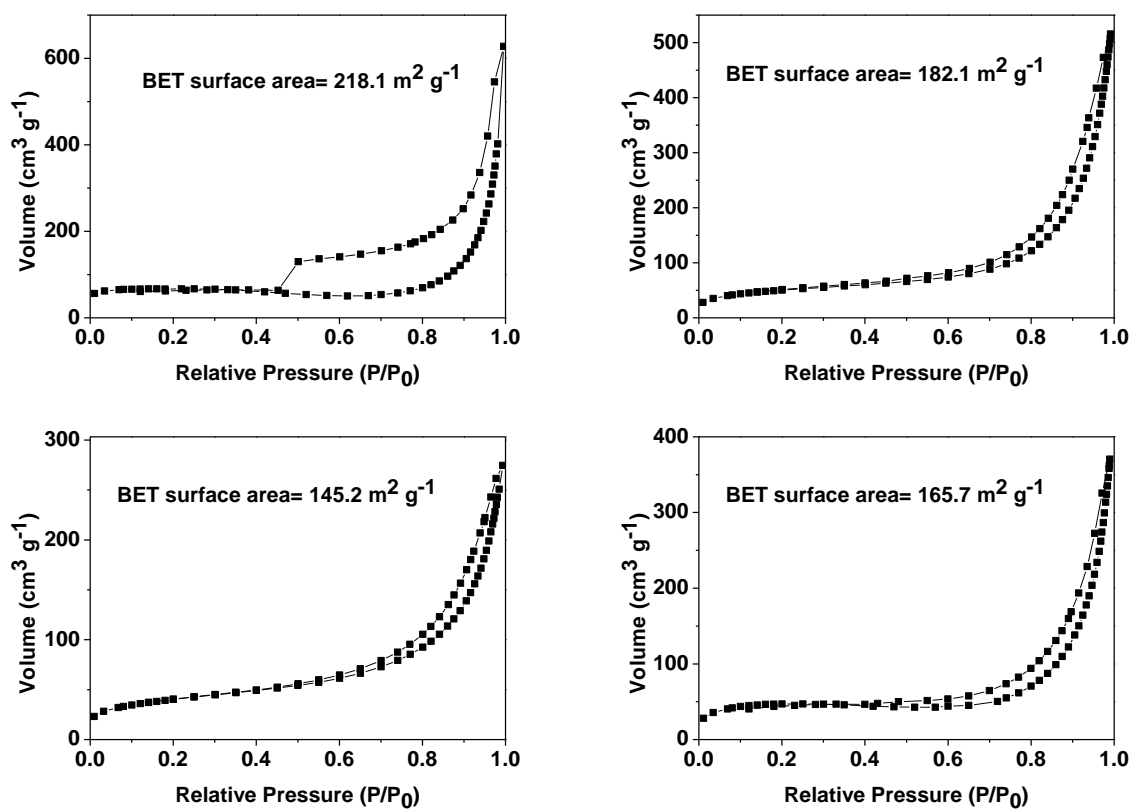

Figure S6. Nitrogen adsorption and desorption isotherms measured at 77 K for (a) graphene and  $\text{Fe}_2\text{O}_3/\text{graphene}$  with  $c(\text{Fe}_2\text{O}_3) =$  (b) 10.7 wt%, (c) 29.0 wt%, (d) 52.1 wt%.

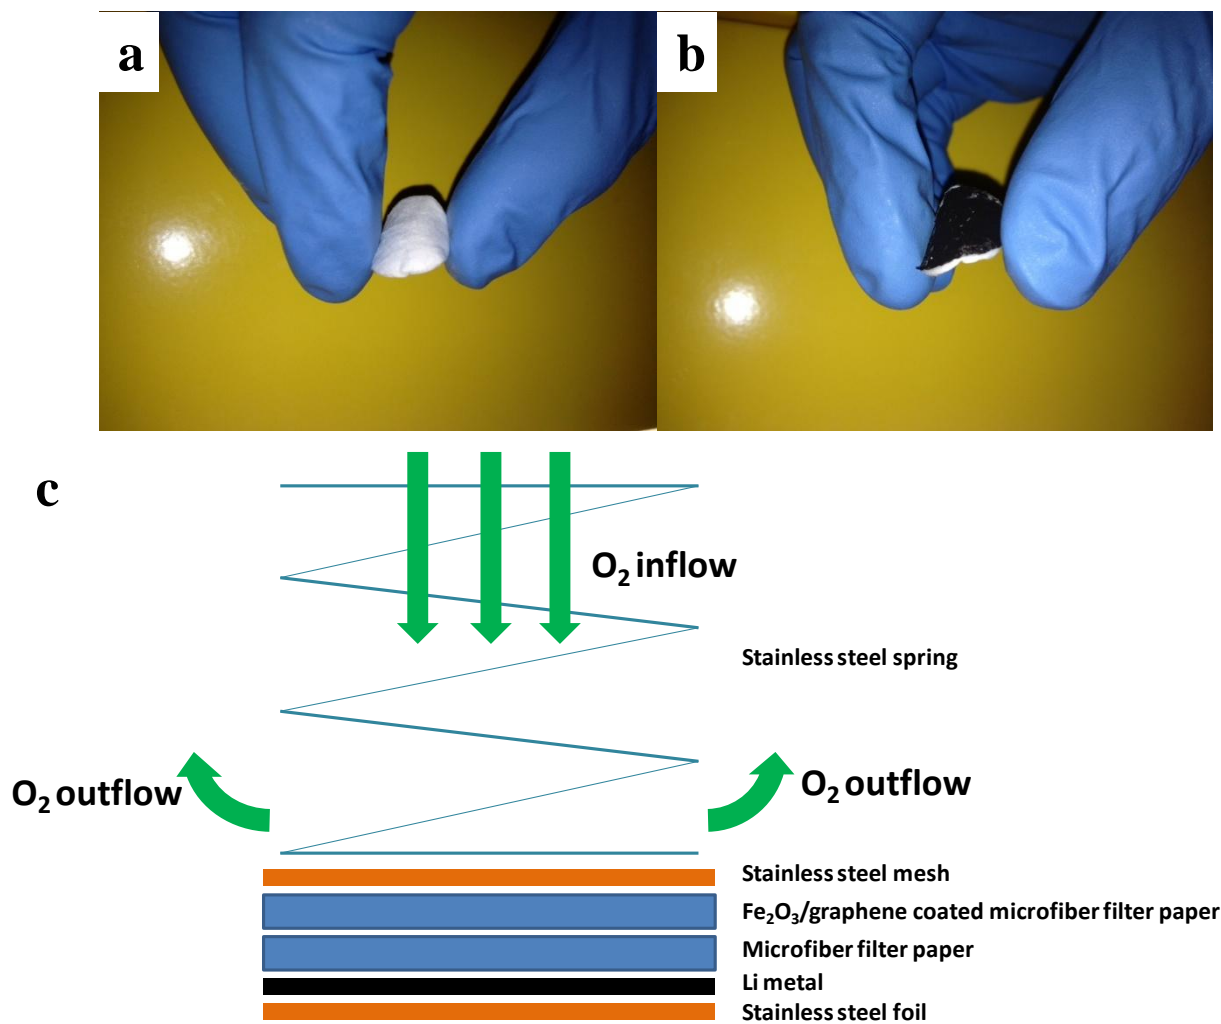

Figure S7. (a) Pristine microfiber filter paper, (b) the  $\text{Fe}_2\text{O}_3/\text{graphene}$  coated microfiber filter paper as  $\text{O}_2$  electrode and (c)  $\text{Li-O}_2$  cell construction.

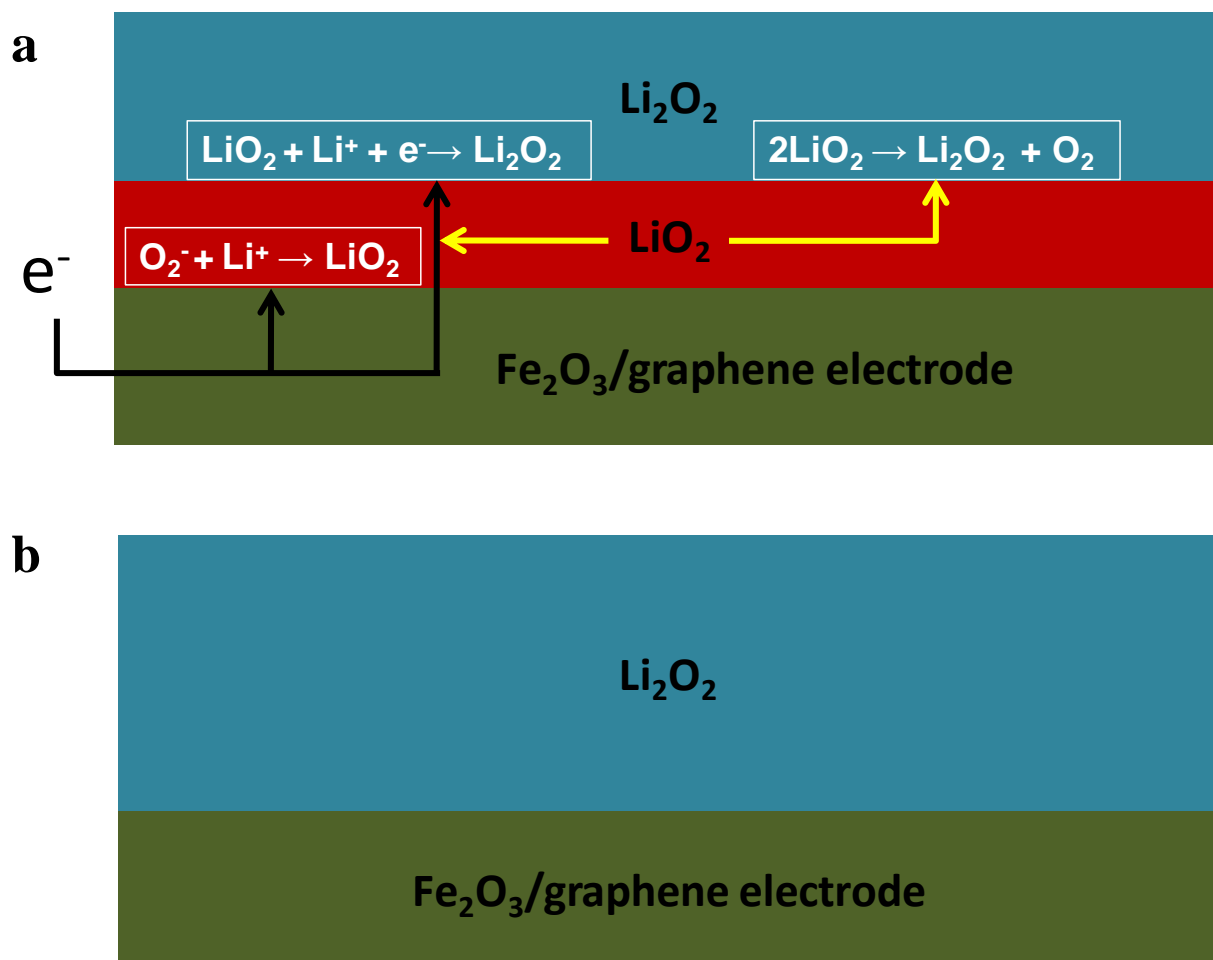

Figure S8. Proposed working mechanism of the  $\text{Fe}_2\text{O}_3/\text{graphene}$  electrode: (a) During discharge and (b) at the end of discharge.
